# Supplementary material for: Real-World Outcomes and Clinical Predictors of Immune Checkpoint Inhibitor Monotherapy in Advanced Lung Cancer
Source: PubMed Central journal article supplement — Clin Med Insights Oncol. 2021 Mar 31;15:11795549211004489. doi: 10.1177/11795549211004489 (PMC8237437; doi:10.1177/11795549211004489), 2021-03-31

Supplementary Table 1. Characteristics of the Ten NSCLC Patients with Therapy Discontinuation After Treatments for 2 Years or More.

| Patient # | PD-L1 Status | Line of Systemic Therapy for ICI | Best Response |
|-----------|--------------|----------------------------------|---------------|
| 1         | 100%         | 1                                | PR            |
| 2         | Unknown      | 3                                | CR            |
| 3         | Unknown      | 2                                | PR            |
| 4         | Unknown      | 2                                | PR            |
| 5         | Unknown      | 2                                | PR            |
| 6         | 80%          | 1                                | CR            |
| 7         | 100%         | 1                                | CR            |
| 8         | 90%          | 1                                | PR            |
| 9         | 0%           | 2                                | PR            |
| 10        | 10%          | 1                                | PR            |

CR, complete response; ICI, immune checkpoint inhibitor; NSCLC, non-small cell lung cancer; PD-L1, programmed death ligand 1; PR, partial response.

Supplementary Table 2. Cox Proportional Hazard Regression Analysis of the Effect of Various Parameters on Progression-Free Survival and Overall Survival (BMI as a continuous variable).

| Variable                          | Progression-free survival |           |         | Overall survival |           |         |
|-----------------------------------|---------------------------|-----------|---------|------------------|-----------|---------|
|                                   | HR                        | 95% CI    | P-value | HR               | 95% CI    | P-value |
| Age (75 vs 60) †                  | 0.87                      | 0.67-1.13 | 0.32    | 0.90             | 0.68-1.19 | 0.61    |
| Sex (male vs female)              | 1.26                      | 0.92-1.72 | 0.15    | 1.29             | 0.92-1.81 | 0.14    |
| ECOG PS (0-1 vs ≥ 2)              | 0.53                      | 0.38-0.74 | < 0.01  | 0.43             | 0.30-0.62 | < 0.01  |
| BMI (30 vs 20) †                  | 0.61                      | 0.40-0.94 | 0.07    | 0.44             | 0.28-0.71 | < 0.01  |
| Smoking (never vs current/former) | 2.07                      | 1.26-3.41 | < 0.01  | 1.48             | 0.86-2.56 | 0.16    |
| irAE (time-varying)               | 1.22                      | 0.82-1.82 | 0.32    | 0.72             | 0.46-1.12 | 0.14    |

†Age and BMI were fit as continuous variables in the multiple Cox regression model. Hazard ratios and 95% CI for the approximate interquartile range are shown. P-values are from Wald null hypothesis tests for each variable over its entire range.

BMI, body mass index; CI, confidence interval; ECOG PS, Eastern Cooperative Oncology Group performance-status score; HR, hazard ratio; irAE, immune-related adverse events.

Supplementary Table 3. Cox Proportional Hazard Regression Analysis of PD-L1 TPS on Progression-Free Survival and Overall Survival.

| Variable                              | Progression-free survival |           |          | Overall survival |           |          |
|---------------------------------------|---------------------------|-----------|----------|------------------|-----------|----------|
|                                       | HR                        | 95% CI    | P-value  | HR               | 95% CI    | P-value  |
| PD-L1 TPS ( $\geq 50\%$ vs $< 50\%$ ) | 0.72                      | 0.45-1.14 | 0.16     | 0.78             | 0.46-1.32 | 0.35     |
| ECOG PS (0-1 vs $\geq 2$ )            | 0.63                      | 0.46-0.86 | $< 0.01$ | 0.44             | 0.31-0.62 | $< 0.01$ |

CI, confidence interval; ECOG PS, Eastern Cooperative Oncology Group performance-status score; HR, hazard ratio; PD-L1, programmed death ligand 1; TPS, tumor proportion score.

Supplementary Table 4. Cox Proportional Hazard Regression Analysis of EGFR Mutation on Progression-Free Survival and Overall Survival.

| Variable                   | Progression-free survival |           |          | Overall survival |           |          |
|----------------------------|---------------------------|-----------|----------|------------------|-----------|----------|
|                            | HR                        | 95% CI    | P-value  | HR               | 95% CI    | P-value  |
| EGFR mutation (Pos vs Neg) | 2.41                      | 1.35-4.30 | $< 0.01$ | 0.85             | 0.42-1.72 | 0.65     |
| ECOG PS (0-1 vs $\geq 2$ ) | 0.58                      | 0.42-0.81 | $< 0.01$ | 0.46             | 0.32-0.65 | $< 0.01$ |

CI, confidence interval; ECOG PS, Eastern Cooperative Oncology Group performance-status score; EGFR, epidermal growth factor receptor; HR, hazard ratio; Neg, negative; Pos, positive.

Supplementary Table 5. Cox Proportional Hazard Regression Analysis of KRAS Mutation on Progression-Free Survival and Overall Survival.

| Variable                   | Progression-free survival |           |          | Overall survival |           |          |
|----------------------------|---------------------------|-----------|----------|------------------|-----------|----------|
|                            | HR                        | 95% CI    | P-value  | HR               | 95% CI    | P-value  |
| KRAS mutation (Pos vs Neg) | 1.21                      | 0.77-1.90 | 0.41     | 1.33             | 0.82-2.17 | 0.25     |
| ECOG PS (0-1 vs $\geq 2$ ) | 0.63                      | 0.46-0.86 | $< 0.01$ | 0.45             | 0.32-0.65 | $< 0.01$ |

CI, confidence interval; ECOG PS, Eastern Cooperative Oncology Group performance-status score; HR, hazard ratio; Neg, negative; Pos, positive.

Supplementary Figure 1. Median overall survival by ECOG and BMI as predicted by the multiple Cox regression model in Supplemental Table 1. Median overall survival is estimated for a female, age of 66 years, never smoker, with no immune-related adverse events.

BMI, body mass index; ECOG, Eastern Cooperative Oncology Group performance status.

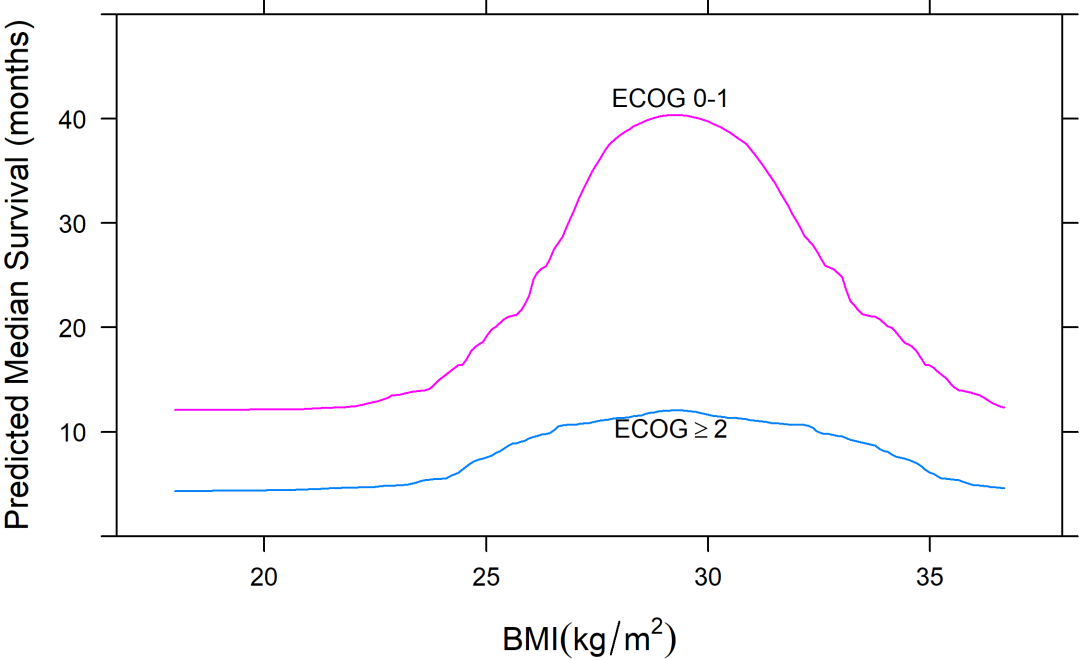

Supplement: sj-pdf-1-onc-10.1177_11795549211004489.pdf [file sj-pdf-1-onc-10.1177_11795549211004489.pdf]
